# Supplementary material for: Kinetics of hydrolysis of 4-methoxyphenyl-2,2-dichloroethanoate in binary water–cosolvent mixtures; the role of solvent activity and solute–solute interactions
Source: Royal Society of Chemistry journal article supplement (doi:10.1039/b414593c), 2005-01-01
Supplement: b414593c.pdf [file b414593c.pdf]

## Supporting Information for:

### **Kinetics of hydrolysis of 4-methoxyphenyl-2,2-dichloroethanoate in binary water-cosolvent mixtures; the role of solvent activity and solute-solute interactions**

Theo Rispens,<sup>a,b</sup> Celia Cabaleiro-Lago,<sup>a,c</sup> and Jan B. F. N. Engberts,<sup>a,d,\*</sup>

- (a) Physical Organic Chemistry Unit, Strating Institute, University of Groningen, Nijenborgh 7, 9747 AG Groningen, The Netherlands.
- (b) E-mail: t.rispens@chem.rug.nl
- (c) E-mail: celiac@uvigo.es
- (d) E-mail: j.b.f.n.engberts@chem.rug.nl

#### Contents:

- Kinetic data for the neutral hydrolysis of *p*-methoxyphenyl-2,2-dichloroethanoate at 25.0 °C for:

|                                    |         |    |
|------------------------------------|---------|----|
| Water/Cyanomethane Mixtures        | Table 1 | S2 |
| Water/PEG400 Mixtures              | Table 2 | S2 |
| Water/Tetrahydrofuran Mixtures     | Table 3 | S3 |
| Water/Ethanol Mixtures             | Table 5 | S4 |
| Water/1-Propanol Mixtures          | Table 6 | S4 |
| Water/2-Propanol Mixtures          | Table 7 | S4 |
| Water/1-Butanol Mixtures           | Table 8 | S5 |
| Water/2-Methyl-2-propanol Mixtures | Table 9 | S5 |

- Isobaric activation parameters for the neutral hydrolysis of *p*-methoxyphenyl-2,2-dichloroethanoate at 25.0 °C for mixtures of water with cyanomethane, PEG400 and tetrahydrofuran:

|         |    |
|---------|----|
| Table 4 | S3 |
|---------|----|

In pure water, the rate constant of the neutral hydrolysis of MPDE is  $k_0 = 3.00 \times 10^{-3} \text{ s}^{-1}$  at 25.0 °C.

The accuracy of the kinetic data is 2-3% for cyanomethane, PEG400, and tetrahydrofuran; and 1-2% for the alcohols.

**Table 1.** Kinetic Data for Water/Cyanomethane Mixtures

| [H <sub>2</sub> O] (M) | $x_{\text{water}}$ | $\ln(k/k_0)$ | $\ln(k/k_0) - 2 \ln a_{\text{water}}$ |
|------------------------|--------------------|--------------|---------------------------------------|
| 53.8                   | 0.988              | -0.261       | -0.237                                |
| 52.1                   | 0.977              | -0.545       | -0.500                                |
| 50.35                  | 0.964              | -0.844       | -0.777                                |
| 50.25                  | 0.963              | -0.925       | -0.855                                |
| 45.2                   | 0.924              | -1.94        | -1.82                                 |
| 40                     | 0.877              | -3.07        | -2.90                                 |
| 34.5                   | 0.821              | -4.09        | -3.91                                 |
| 28.7                   | 0.750              | -5.01        | -4.82                                 |
| 23.4                   | 0.673              | -5.70        | -5.50                                 |

**Table 2.** Kinetic Data for Water/PEG400 Mixtures

| [H <sub>2</sub> O] (M) | $x_{\text{water}}$ | $\ln(k/k_0)$ | $\ln(k/k_0) - 2 \ln a_{\text{water}}$ |
|------------------------|--------------------|--------------|---------------------------------------|
| 55.34                  | 0.9999             | -0.010       | -0.006                                |
| 52.31                  | 0.9968             | -0.301       | -0.291                                |
| 51.13                  | 0.9955             | -0.473       | -0.461                                |
| 49.24                  | 0.9933             | -0.720       | -0.702                                |
| 46.74                  | 0.9902             | -0.968       | -0.941                                |
| 44.7                   | 0.9873             | -1.24        | -1.20                                 |
| 39.71                  | 0.9793             | -1.83        | -1.77                                 |
| 37.28                  | 0.9747             | -2.18        | -2.09                                 |
| 34.24                  | 0.9681             | -2.57        | -2.45                                 |
| 30.21                  | 0.9575             | -3.31        | -3.13                                 |

**Table 3.** Kinetic Data for Water/Tetrahydrofuran Mixtures

| [H <sub>2</sub> O] (M) | $x_{\text{water}}$ | $\ln(k/k_0)$ | $\ln(k/k_0) - 2 \ln a_{\text{water}}$ |
|------------------------|--------------------|--------------|---------------------------------------|
| 52.2                   | 0.986              | -0.505       | -0.481                                |
| 49.0                   | 0.971              | -1.01        | -0.960                                |
| 45.7                   | 0.954              | -1.73        | -1.66                                 |
| 42.1                   | 0.933              | -2.76        | -2.66                                 |
| 39.9                   | 0.918              | -3.22        | -3.11                                 |
| 34.0                   | 0.875              | -4.09        | -3.96                                 |

**Table 4.** Isobaric activation parameters at 25.0 °C.

| cosolvent       | $x_{\text{water}}$ | $\Delta^\ddagger G$ (kJ/mol) | $\Delta^\ddagger H$ (kJ/mol) | $-T\Delta^\ddagger S$ (kJ/mol) |
|-----------------|--------------------|------------------------------|------------------------------|--------------------------------|
| none            | 1                  | 87.5                         | 35.1                         | 52.4                           |
|                 | 0.922              | 92.5                         | 35.0                         | 57.5                           |
| cyanomethane    | 0.875              | 95.1                         | 37.6                         | 57.5                           |
|                 | 0.817              | 97.8                         | 57.4                         | 40.3                           |
| PEG400          | 0.9873             | 90.5                         | 37.7                         | 52.8                           |
|                 | 0.9747             | 92.9                         | 42.0                         | 50.9                           |
|                 | 0.968              | 94.0                         | 44.8                         | 49.2                           |
| tetrahydrofuran | 0.971              | 90.0                         | 40.5                         | 49.5                           |
|                 | 0.954              | 91.8                         | 47.5                         | 44.6                           |
|                 | 0.936              | 93.7                         | 48.5                         | 45.3                           |
|                 | 0.918              | 95.5                         | 44.5                         | 51.0                           |

The accuracy  $\Delta^\ddagger G$  of is 0.1 kJ/mol, that of  $\Delta^\ddagger H$  and  $-T\Delta^\ddagger S$  1.5 kJ/mol.

**Table 5.** Kinetic Data for Water/Ethanol Mixtures

| $x_{\text{water}}$ | $\ln(k/k_0)$ | $\ln(k/k_0) - 2 \ln x_{\text{water}}$ |
|--------------------|--------------|---------------------------------------|
| 0.995              | -0.0782      | -0.0686                               |
| 0.990              | -0.153       | -0.132                                |
| 0.985              | -0.238       | -0.207                                |
| 0.980              | -0.318       | -0.278                                |
| 0.976              | -0.385       | -0.336                                |
| 0.970              | -0.490       | -0.428                                |

**Table 6.** Kinetic Data for Water/1-Propanol Mixtures

| $x_{\text{water}}$ | $\ln(k/k_0)$ | $\ln(k/k_0) - 2 \ln x_{\text{water}}$ |
|--------------------|--------------|---------------------------------------|
| 0.997              | -0.0683      | -0.0622                               |
| 0.995              | -0.127       | -0.116                                |
| 0.992              | -0.189       | -0.173                                |
| 0.989              | -0.266       | -0.243                                |
| 0.983              | -0.394       | -0.360                                |

**Table 7.** Kinetic Data for Water/2-Propanol Mixtures

| $x_{\text{water}}$ | $\ln(k/k_0)$ | $\ln(k/k_0) - 2 \ln x_{\text{water}}$ |
|--------------------|--------------|---------------------------------------|
| 0.995              | -0.109       | -0.0990                               |
| 0.990              | -0.225       | -0.205                                |
| 0.985              | -0.345       | -0.315                                |
| 0.980              | -0.480       | -0.440                                |
| 0.975              | -0.614       | -0.563                                |

**Table 8.** Kinetic Data for Water/1-Butanol Mixtures

| $x_{\text{water}}$ | $\ln(k/k_0)$ | $\ln(k/k_0) - 2 \ln x_{\text{water}}$ |
|--------------------|--------------|---------------------------------------|
| 0.997              | -0.0786      | -0.0735                               |
| 0.995              | -0.171       | -0.161                                |
| 0.993              | -0.244       | -0.229                                |
| 0.990              | -0.337       | -0.317                                |
| 0.987              | -0.442       | -0.416                                |

**Table 9.** Kinetic Data for Water/2-Methyl-2-propanol Mixtures

| $x_{\text{water}}$ | $\ln(k/k_0)$ | $\ln(k/k_0) - 2 \ln x_{\text{water}}$ |
|--------------------|--------------|---------------------------------------|
| 0.995              | -0.120       | -0.110                                |
| 0.990              | -0.261       | -0.241                                |
| 0.985              | -0.403       | -0.373                                |
| 0.980              | -0.587       | -0.546                                |
| 0.976              | -0.749       | -0.700                                |
